# Supplementary material for: Morphological Changes in Astrocytes by Self-Oxidation of Dopamine to Polydopamine and Quantification of Dopamine through Multivariate Regression Analysis of Polydopamine Images
Source: MDPI journal article supplement (doi:10.3390/polym12112483), 2020-10-26
Supplement: s1 [file s1]

## Article

# Morphological Changes in Astrocytes by Self-Oxidation of Dopamine to Polydopamine and Quantification of Dopamine through Multivariate Regression Analysis of Polydopamine Images

Anik Karan <sup>1,†</sup>, Elnaz Khezerlou <sup>1,2,†</sup>, Farnaz Rezaei <sup>3</sup>, Leon Iasemidis <sup>1,2</sup>, Mark A. DeCoster <sup>1,2,4\*</sup>
<sup>1</sup> Biomedical Engineering Department, College of Engineering and Science, Louisiana Tech University, Ruston, LA 71270, USA; aka029@latech.edu (A.K.); ekh008@latech.edu (E.K.); leonidas@latech.edu (L.I.)

<sup>2</sup> Center for Biomedical Engineering and Rehabilitation Science, College of Engineering and Science, Louisiana Tech University, Ruston, LA 71270, USA.

<sup>3</sup> Computational Analysis and Modeling Program, College of Engineering and Science, Louisiana Tech University, Ruston, LA 71270, USA; fre004@latech.edu (F.R.)

<sup>4</sup> Institute for Micromanufacturing, College of Engineering and Science, Louisiana Tech University, Ruston, LA 71270, USA.

\* Correspondence: decoster@latech.edu

Received: 21 September 2020; Accepted: 21 October 2020; Published: date

## Supplementary:

### 1. Formula Proofs

#### 1.1. Proof of (2)

If  $Y_i$  ( $i = 1, \dots, n$ ) are functions of  $m$  regressor variables  $X = [x_{i1}, \dots, x_{im}]$  with  $n > m$ , the multiple linear regression model  $Y_i = A \cdot X_i$  can be used to linearly approximate the relationship between  $Y$  (DA concentrations) and  $X$  (RGB color intensities) [30]. In our application here,  $m = 3$  (three colors) and  $n = 6$  (six DA concentrations; one of which is for  $C = 0$ ). Also, we had three different trials ( $K = 3$ ) per experiment and the question was how to also incorporate their data in the formulation of the model. Let's denote by  $X_i^{(k)}$  ( $k = 1, \dots, K$ ) the observation/data point of the  $i^{\text{th}}$  intensity with the  $i^{\text{th}}$  concentration from the  $k^{\text{th}}$  trial. Then the best fitted model over the  $K$  trials can be found by minimizing the least squares errors of the trials in some optimal combination that we show below.

We now have a set of multiple linear regression models  $Y = A \cdot X^{(k)}$ . Then, the matrix format of the least squares error function can be expressed as:

$$L = \sum_{k=1}^K (Y - AX^{(k)})(Y - AX^{(k)})^T \quad (\text{S-1})$$

where  $A$  is a  $(1 \times m)$  matrix containing the model coefficients (in this particular application, the intercepts of the model are assumed to be zero, that is, concentration  $C = 0$  if RGB intensities = 0),  $Y$  and  $X^{(k)}$  are matrices with dimensions  $(1 \times n)$  and  $(m \times n)$ , respectively. The least squares estimates of the model coefficients must then satisfy:

$$\frac{\partial L}{\partial A} = \sum_{k=1}^K 2(AX^{(k)}\{X^{(k)}\}^T - Y\{X^{(k)}\}^T) = 0 \quad (\text{S-2})$$

which results in:

$$A \sum_{k=1}^K \mathbf{X}^{(k)} \{\mathbf{X}^{(k)}\}^T = \mathbf{Y} \sum_{k=1}^K \{\mathbf{X}^{(k)}\}^T \quad (\text{S-3})$$

$$\mathbf{Y} = A \left( \sum_{k=1}^K \mathbf{X}^{(k)} \{\mathbf{X}^{(k)}\}^T \right) \left( \sum_{k=1}^K \{\mathbf{X}^{(k)}\}^T \right)^+ \quad (\text{S-4})$$

Hence, the set of the multiple linear regression models over  $K$  trials is reduced to one general regression model of the form  $\mathbf{Y} = A\bar{\mathbf{X}}$ , where  $\bar{\mathbf{X}} = \left( \sum_{k=1}^K \mathbf{X}^{(k)} \{\mathbf{X}^{(k)}\}^T \right) \left( \sum_{k=1}^K \{\mathbf{X}^{(k)}\}^T \right)^+$  with the superscript  $(+)$  denoting the Moore-Penrose pseudo-inverse of a matrix [29].

### 1.2. Proof of (4)

In this case, we consider  $\mathbf{X}$  (the RGB intensities) as a function of  $\mathbf{Y}$  (the DA concentrations) because we are called to estimate  $\mathbf{X}$  if  $\mathbf{Y}$  is known. Then, the simple linear regression model  $X_i = B \cdot Y_i$  is used to linearly approximate the relationship between  $\mathbf{X}$  and  $\mathbf{Y}$ . But we still here have data from multiple trials per experiment to fit the model on.

To fit a simple linear regression model to the data over  $K$  trials  $\mathbf{X}^{(k)} = B \cdot \mathbf{Y}$  ( $k = 1, \dots, K$ ), we have to minimize the least squares errors from each trial. Here, since RGB intensities could be non-zero even if DA concentration is zero, we consider the most general case where the intercept of the fitted line may not be zero. Then,  $\mathbf{Y}$  is a  $(2 \times n)$  matrix where all its first-row elements are ones, and  $B$  is a  $(1 \times 2)$  regression coefficient matrix containing the interception and the slope of the fitted line. Then, by defining the squared error function  $L$  as:

$$L = \sum_{k=1}^K (\mathbf{X}^{(k)} - B\mathbf{Y})(\mathbf{X}^{(k)} - B\mathbf{Y})^T \quad (\text{S-5})$$

For minimization of  $L$ , the least squares estimators should satisfy:

$$\frac{\partial L}{\partial B} = \sum_{k=1}^K 2(B\mathbf{Y}\mathbf{Y}^T - \mathbf{X}^{(k)}\mathbf{Y}^T) = 0 \quad (\text{S-6})$$

$$B\mathbf{Y}\mathbf{Y}^T = \left( \sum_{k=1}^K \mathbf{X}^{(k)} \right) \mathbf{Y}^T \quad (\text{S-7})$$

$$\left( \sum_{k=1}^K \mathbf{X}^{(k)} \right) = B\mathbf{Y} \quad (\text{S-8})$$

Hence, the simple linear regression model over  $K$  trials is reduced to a simple regression model of the form  $\bar{\mathbf{X}} = B\mathbf{Y}$ , where  $\bar{\mathbf{X}}$  is to be taken as the average of  $\mathbf{X}$  over the  $K$  trials.

## 2. Figures

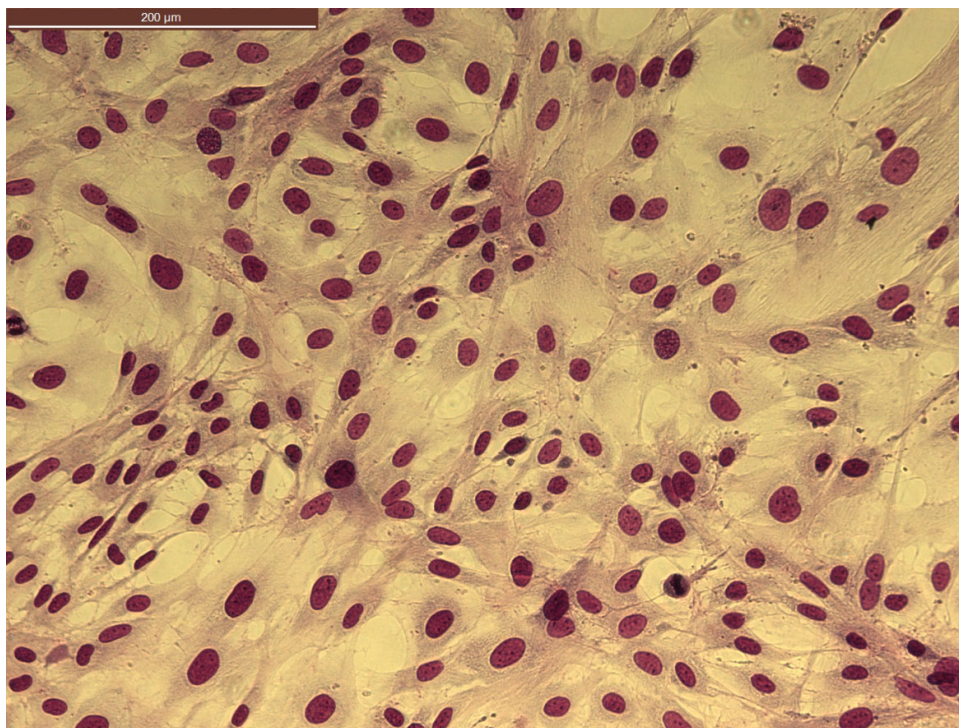

**Figure S1:** Treatment of 5000 astrocytes/well with no dopamine added (control). Diff-Quik stained astrocytes, 48 h post treatment; scale bar indicates 200 microns.

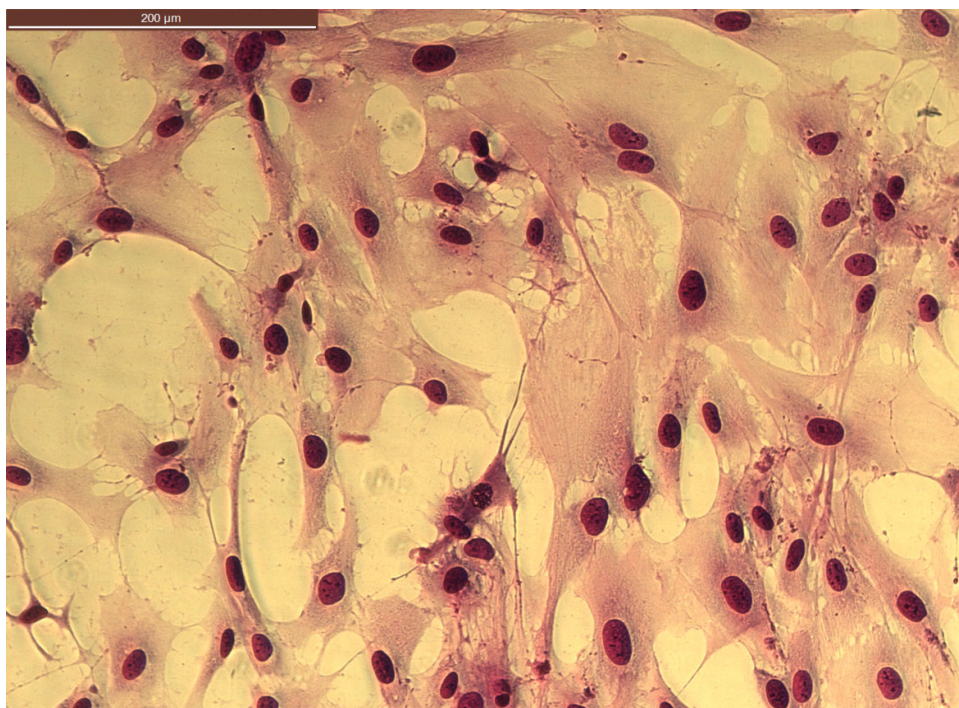

**Figure S2:** Treatment of 5000 astrocytes/well with 25 μM dopamine. Diff-Quik stained astrocytes, 48 h post treatment; scale bar indicates 200 microns.



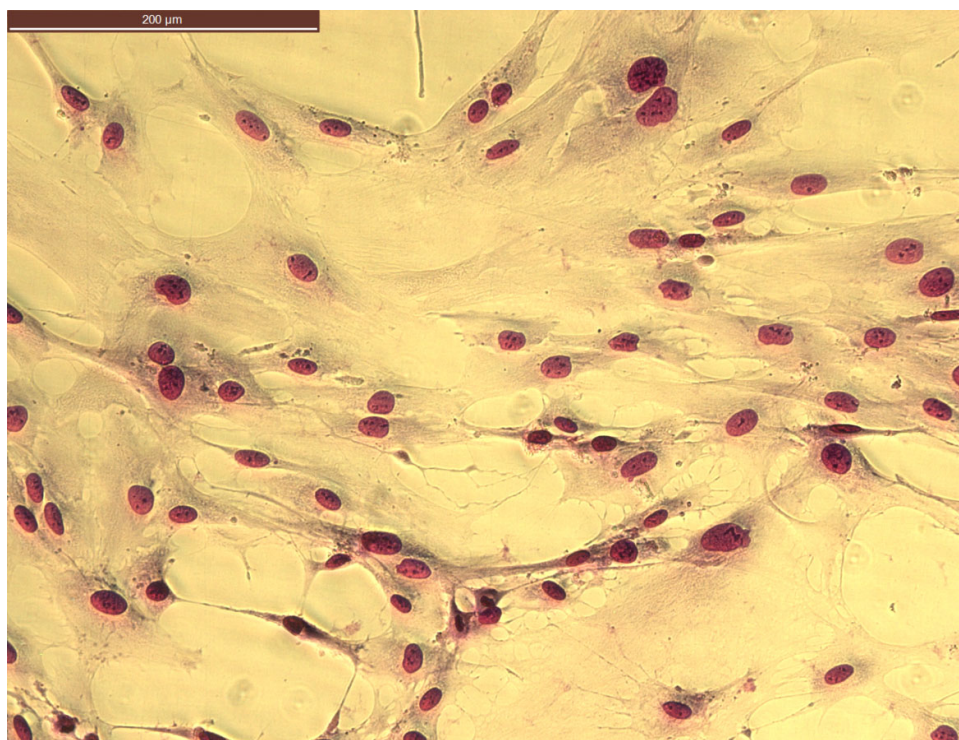

**Figure S3:** Treatment of 5000 astrocytes/well with 50  $\mu$ M dopamine. Diff-Quik stained astrocytes, 48 h post treatment; scale bar indicates 200 microns.

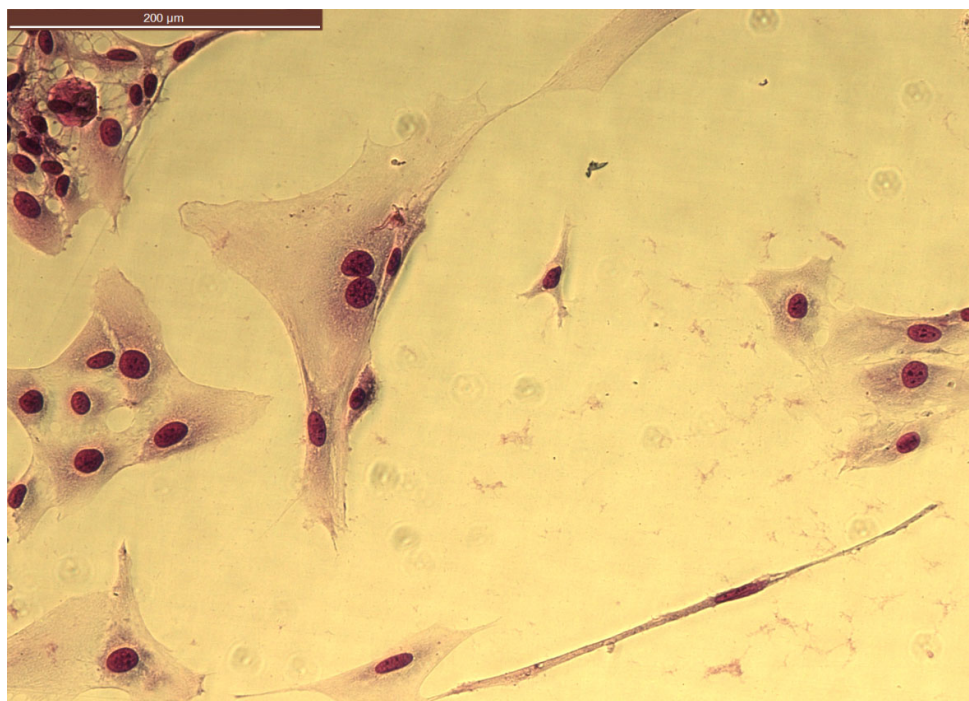

**Figure S4:** Treatment of 5000 astrocytes/well with 75  $\mu$ M dopamine. Diff-Quik stained astrocytes, 48 h post treatment; scale bar indicates 200 microns.



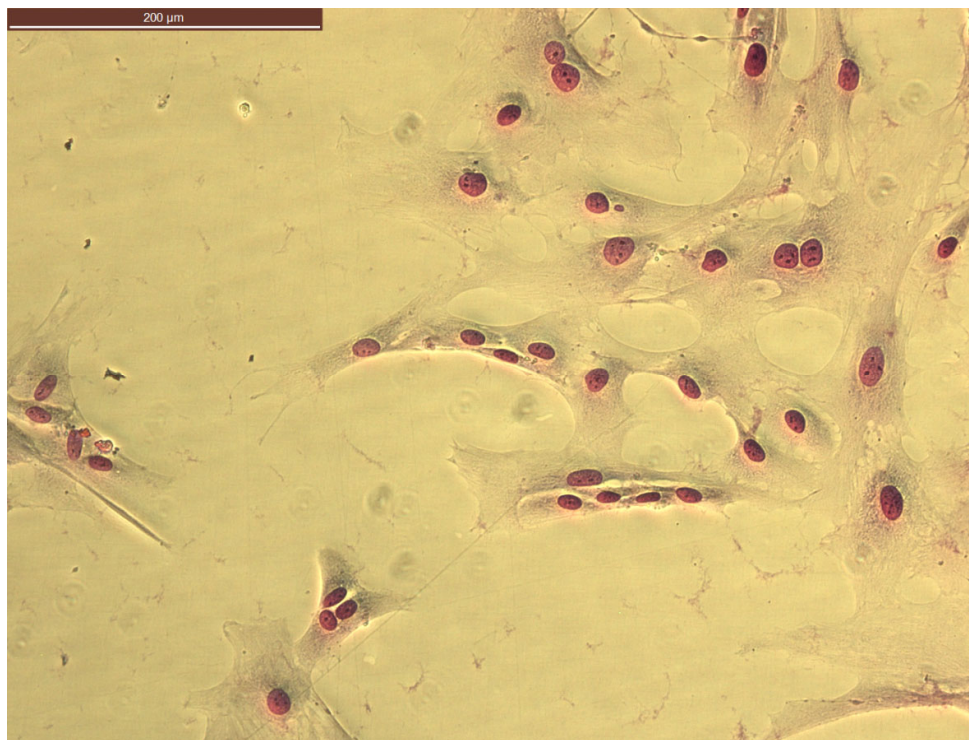

**Figure S5:** Treatment of 5000 astrocytes/well with 100  $\mu$ M dopamine. Diff-Quik stained astrocytes, 48 h post treatment; scale bar indicates 200 microns.

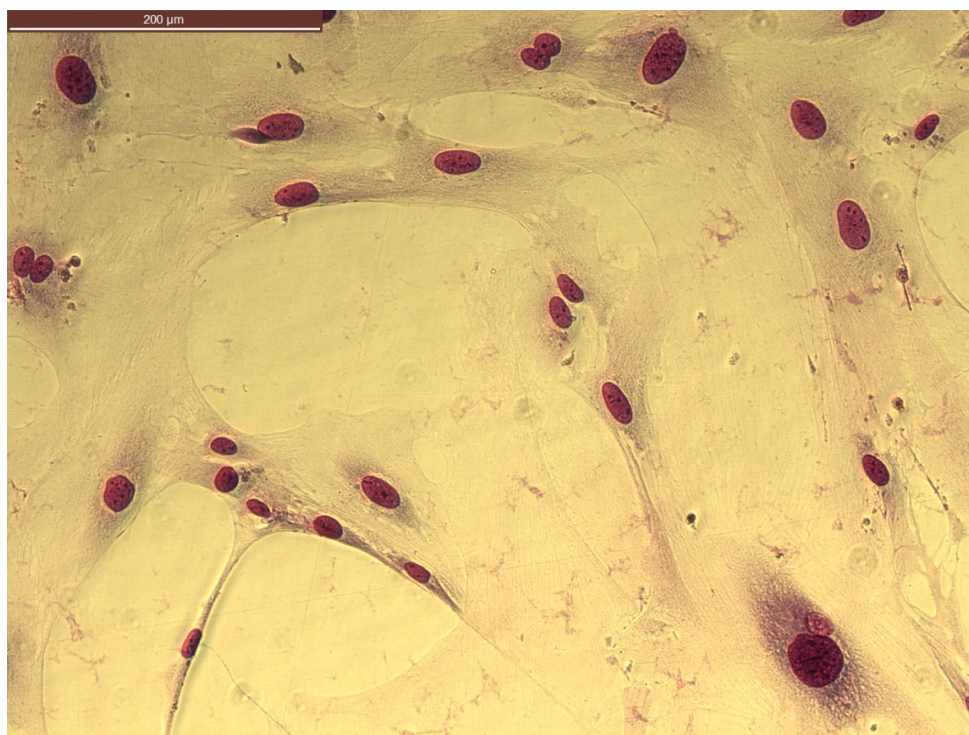

**Figure S6:** Treatment of 5000 astrocytes/well with 125  $\mu$ M dopamine. Diff-Quik stained astrocytes, 48 h post treatment; scale bar indicates 200 microns.

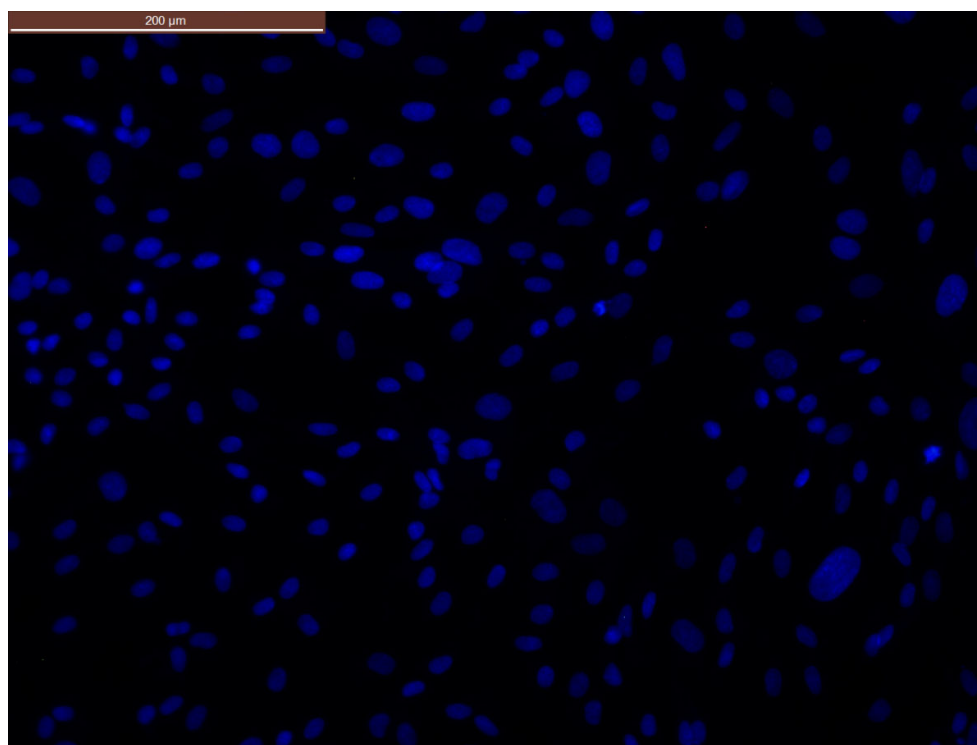

**Figure S7:** DAPI stained astrocytes (untreated control); scale bar indicates 200 microns.

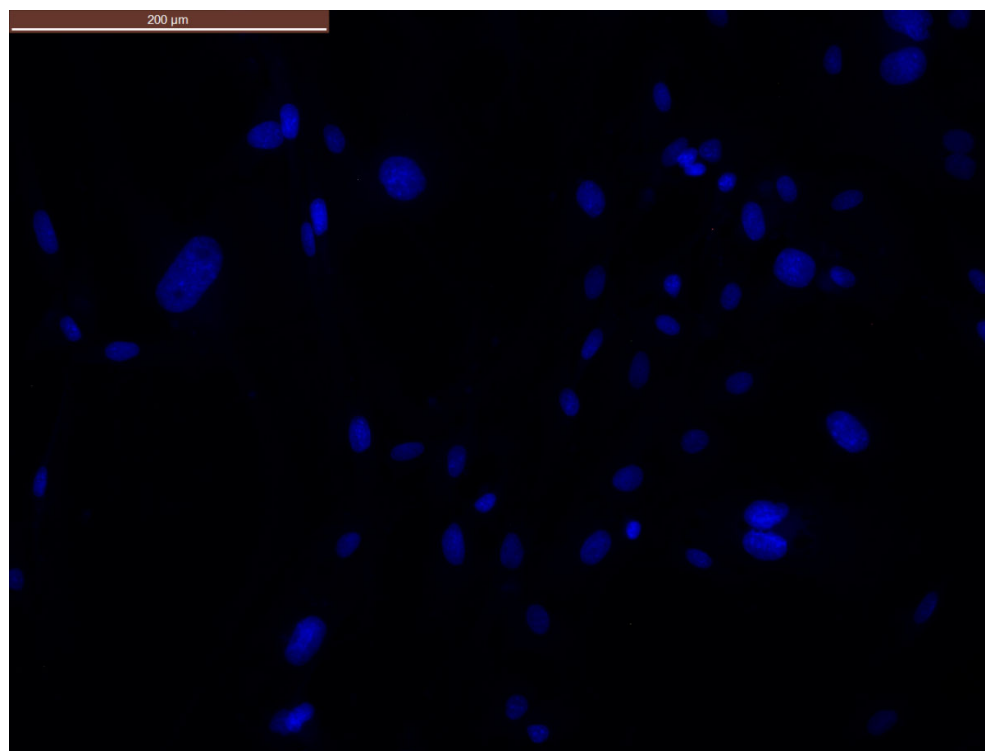

**Figure S8:** DAPI stained astrocytes (treated with 25 μM dopamine); scale bar indicates 200 microns.

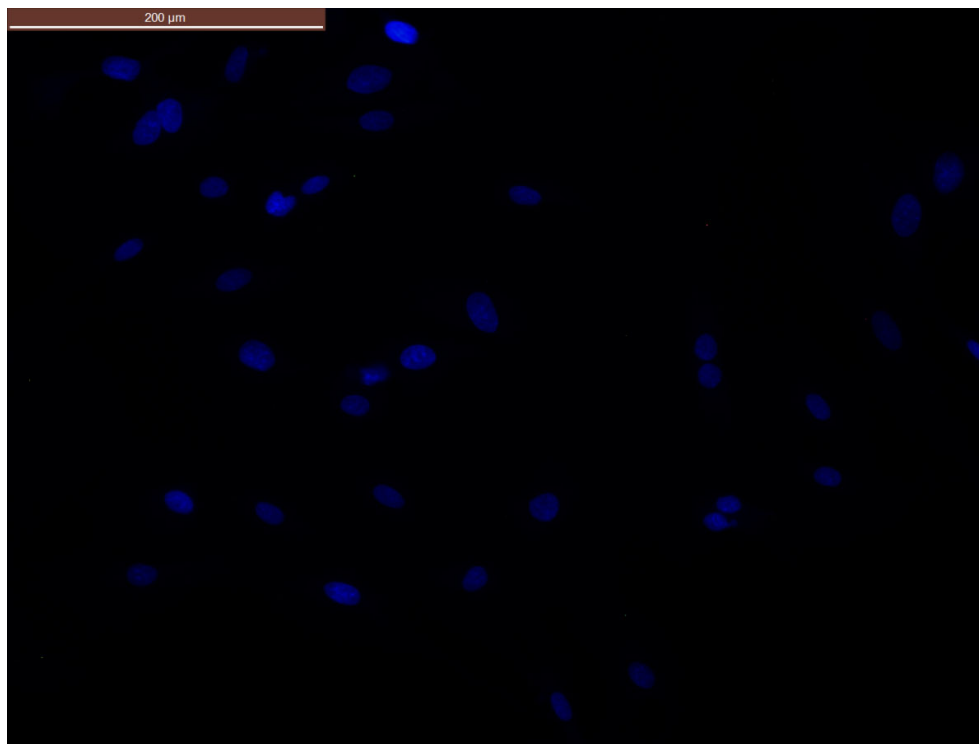

**Figure S9:** DAPI stained astrocytes (treated with 50  $\mu$ M dopamine); scale bar indicates 200 microns.

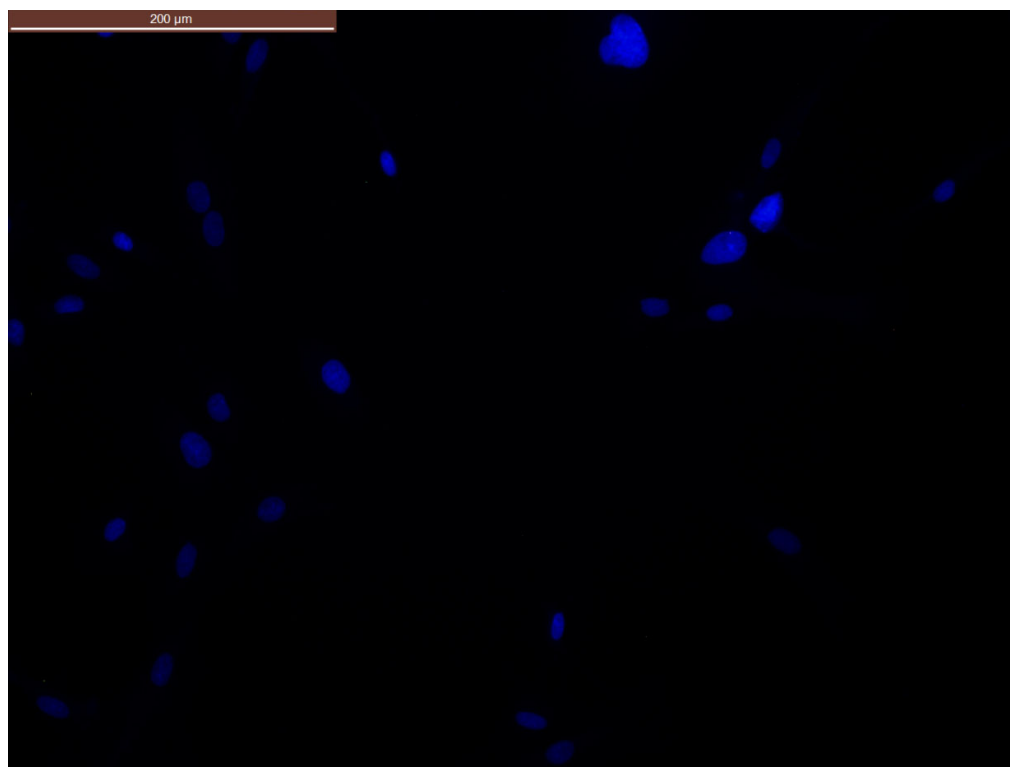

**Figure S10:** DAPI stained astrocytes (treated with 75  $\mu$ M dopamine); scale bar indicates 200 microns.

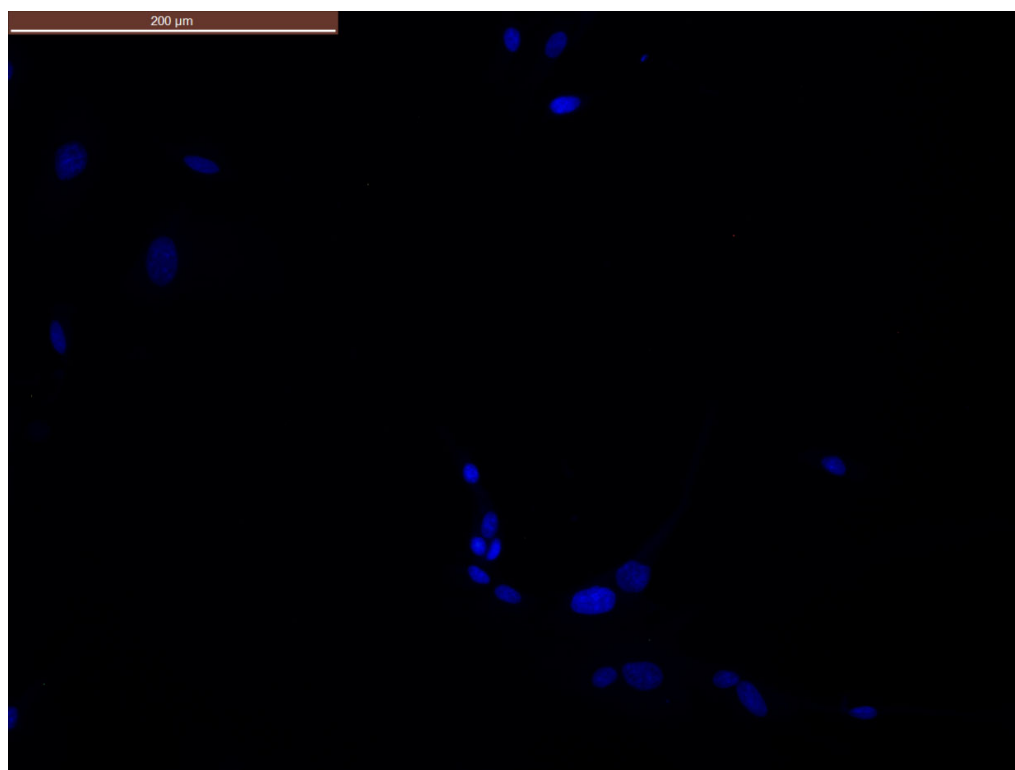

**Figure S11:** DAPI stained astrocytes (treated with 100  $\mu$ M dopamine); scale bar indicates 200 microns.

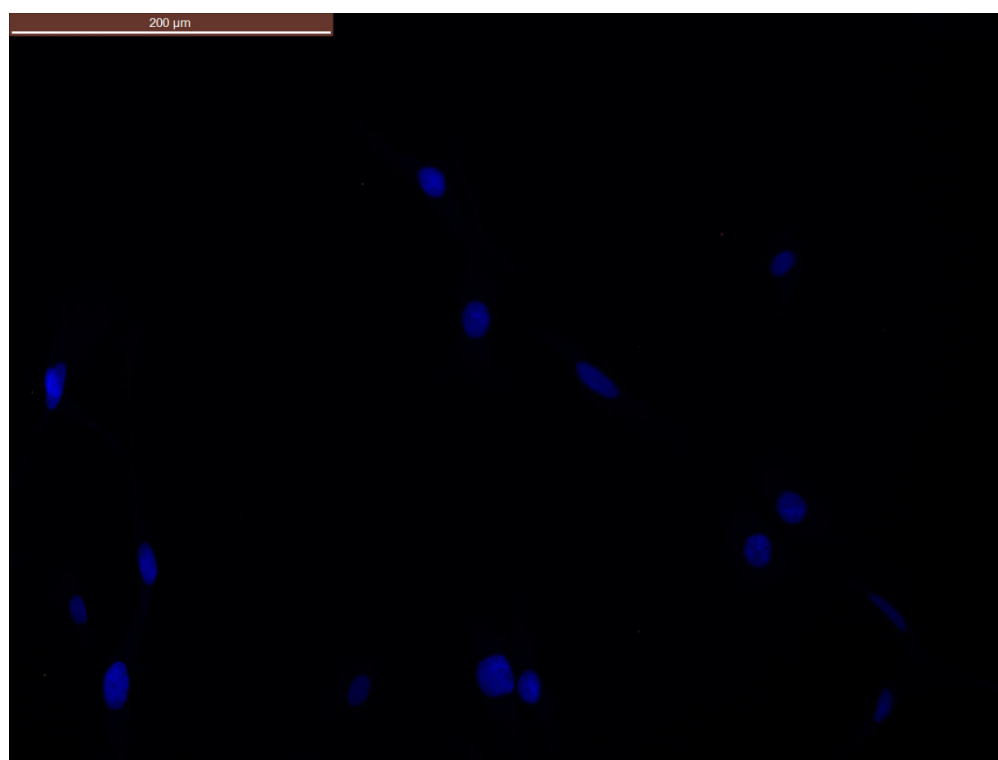

**Figure S12:** DAPI stained astrocytes (treated with 125  $\mu$ M dopamine); scale bar indicates 200 microns.
